# Supplementary material for: lncRNA APOC1P1-3 promoting anoikis-resistance of breast cancer cells
Source: PubMed Central journal article supplement (PMC8074441; doi:10.1186/s12935-021-01916-w), 2021-04-26

**LncRNA APOC1P1-3 promoting anoikis-resistance of breast cancer cells**  
Ping Zhou\*

**Supplementary**

**Table S1.** Verification of the non-coding characteristics of lncRNA-APOC1P1-3.

| <b>Label</b> | <b>Strand</b> | <b>Frame</b> | <b>Start</b> | <b>Stop</b> | <b>Length(bp/aa)</b> |
|--------------|---------------|--------------|--------------|-------------|----------------------|
| ORF6         | -             | 2            | 453          | 286         | 168/55               |
| ORF8         | -             | 3            | 380          | 297         | 84/27                |
| ORF3         | +             | 3            | 51           | 125         | 75/24                |
| ORF2         | +             | 2            | 428          | 493         | 66/21                |
| ORF4         | +             | 3            | 240          | 302         | 63/20                |
| ORF5         | -             | 1            | 52           | >2          | 51/16                |
| ORF7         | -             | 2            | 264          | 214         | 51/16                |
| ORF1         | +             | 1            | 379          | 420         | 42/13                |

LncRNA-APOC1P1-3 has 8 ORFs, each is less than 200nt. All ORFs labeled "+" after BLAST and these short peptides have no homologous proteins.

**Table S2.** Comparison of the target microRNAs with different databases.

| <b>Names</b>                         | <b>Total</b> | <b>Elements</b>                                                                                                                                     |
|--------------------------------------|--------------|-----------------------------------------------------------------------------------------------------------------------------------------------------|
| <b>PITA<br/>Kangcheng</b>            | <b>8</b>     | <b>hsa-miR-193a-5p<br/>hsa-miR-587<br/>hsa-miR-566<br/>hsa-miR-483-5p<br/>hsa-miR-188-3p<br/>hsa-miR-369-5p<br/>hsa-miR-502-5p<br/>hsa-miR-1290</b> |
| <b>Miranda<br/>PITA</b>              | <b>2</b>     | <b>hsa-miR-204<br/>hsa-miR-211</b>                                                                                                                  |
| <b>Kangcheng<br/>miRDB4<br/>PITA</b> | <b>1</b>     | <b>hsa-miR-188-3p</b>                                                                                                                               |

There are 8 cross results among PITA database and chip results (Kangcheng). PITA and Miranda have 2 cross results, and miRDB4, PITA and Kangcheng have 1 cross result.

**Table S3.** 20 sets of random mutations for binding sites, and its thermodynamics.

| NO.      | Mutant sequences                   | mfe(kcal/mol) |
|----------|------------------------------------|---------------|
| 1        | AGTGAAGTTCGTGGCAAGATCTGCGAT        | -18.6         |
| 2        | AGTGAGCTTCATACCAAGGTGTGGAAT        | -18.9         |
| 3        | AGTGAATTTGCTGGCAAGCTGTAGGAT        | -19.4         |
| <b>4</b> | <b>AGTGAGCTTCGTGCCAAGGTGGGGTAT</b> | <b>-25.4</b>  |
| 5        | AGTGAGCTTCGTGCCAAGGTGGGGCAT        | -25.3         |
| 6        | AGTGAGCTTCTTGGCAAGGTGTAGGAT        | -20.7         |
| 7        | AGTGGACTTTCTACCAAGCTGTGAGAT        | -17.5         |
| 8        | AGTGGACTTCCGGCCAAGGTGGGCGAT        | -22.3         |
| 9        | AGTGAATTTTCATGGCAAGGTGTAGGAT       | -18.3         |
| 10       | AGTGAGCTTACTGTCAAGACGTGCGAT        | -17.3         |
| 11       | AGTGGACTTACTACCAAGGTGCGGGAT        | -17.6         |

**Table S4.** The primer sequences are described in table S4.

| Gene name            | Forward primer(5'-3') | Reverse primer(5'-3')    |
|----------------------|-----------------------|--------------------------|
| APOC1P1-3<br>Primer1 | GGTCCTGGTGGTGGTTCTGTC | CTCCTTCACTTTCCGAAATGTCTC |
| APOC1P1-3<br>Primer2 | AGGATTCAGGTTGGTGCCC   | TCTGTGTGATGCGGTTGATGA    |
| GAPDH                | GGGAAACTGTGGCGTGAT    | GAGTGGGTGTCGCTGTTGA      |
| $\beta$ -actin       | GGTGGCTTTTAGGATGGCAAG | ACTGGAACGGTGAAGGTGACAG   |



**Figure S2.** Site-directed mutation in pmirGLO-APOC1P1-3'UTR plasmid.

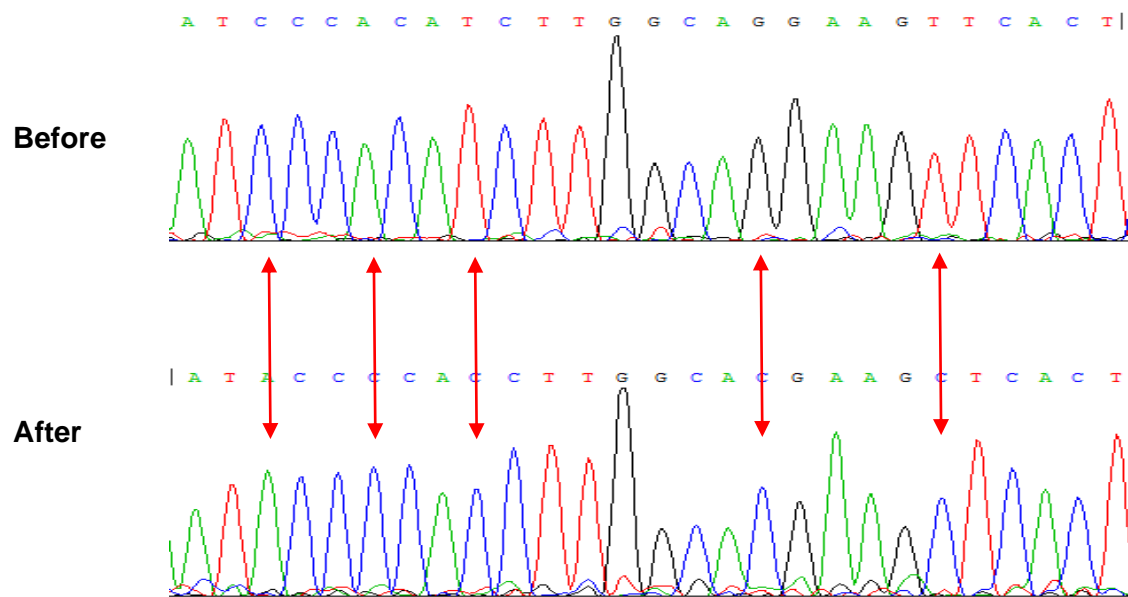

Supplement: 12935_2021_1916_MOESM1_ESM.pdf [file 12935_2021_1916_MOESM1_ESM.pdf]
